# Supplementary material for: Dynamic Large-Scale Chromosomal Rearrangements Fuel Rapid Adaptation in Yeast Populations
Source: PubMed Central journal article supplement (PMC3554576; doi:10.1371/journal.pgen.1003232), 2013-01-24
Supplement: pgen.1003232.s007.pdf [file pgen.1003232.s007.pdf]

**TABLE S1.** Single nucleotide polymorphisms in the junction sites

| Strain | Chr VII + VIII <sup>a</sup> |       | Chr VIII + VIII <sup>a</sup> |       |
|--------|-----------------------------|-------|------------------------------|-------|
| EC10   | 1/455                       | 0.22% | 1/1166                       | 0.09% |
| EC35   | 1/455                       | 0.22% | 1/1166                       | 0.09% |
| EC36   | 0/455                       | 0%    | 1/1166                       | 0.09% |
| EC39   | 0/455                       | 0%    | 1/1166                       | 0.09% |
| EC57   | 0/455                       | 0%    | 1/1166                       | 0.09% |
| EC58   | 0/455                       | 0%    | 1/1166                       | 0.09% |

<sup>a</sup> number of single nucleotide polymorphisms/number of total sequenced nucleotides in the junction site.
