# Supplementary material for: Dynamic Large-Scale Chromosomal Rearrangements Fuel Rapid Adaptation in Yeast Populations
Source: PubMed Central journal article supplement (PMC3554576; doi:10.1371/journal.pgen.1003232), 2013-01-24
Supplement: pgen.1003232.s008.pdf [file pgen.1003232.s008.pdf]

**TABLE S2.** Gene expression under copper treatment

Genes whose expression is up-regulated more than 1.5-fold (*CUP2*, *CUP2/cup2Δ*, *cup2Δ*)

*PDR5*, *PHO84*, *GLN1*, *GLT1*, *SNQ2*, *ILV3*, *ACO2*, *CYB5*, *SCM4*, *ARG4*, *MET6*, *CLN2*, *YGL117W*, *ERG11*, *LYS4*, *GFD2*, *DUR1,2*, *CPA2*, *STP4*, *HPT1*, *HIS1*, *ARO10*, *MET10*, *ERG24*, *ASN1*, *RLI1*, *FCY2*, *YMC2*, *CIN2*, *YHR022C*, *LIA1*, *RFU1*, *SAM2*, *FUR1*, *ERG28*, *HNMI*, *SDH2*, *YPS3*, *FCY21*

Genes whose expression is down-regulated more than 1.5-fold (*CUP2*, *CUP2/cup2Δ*, *cup2Δ*)

*RPN3*, *GSH1*, *SCL1*, *PUT3*, *CDC48*, *PUP3*, *YFR035C*, *YBL107C*, *YME1*, *CUR1*, *MGAI*, *RPN11*, *ECM21*, *RRF1*, *RPN1*, *PDII*, *PRE2*, *RAD52*, *PRE4*, *IRC20*, *MND1*, *FMP40*, *RPN9*, *YML131W*, *PRE3*, *RPT6*, *UME6*, *RPN6*, *ALG13*, *SLG1*, *PRE10*, *PRE8*, *PRE1*, *RPN7*, *DSK2*, *RPN2*, *YHR033W*, *CAD1*, *PRB1*, *YCR062W*, *NPL4*, *RPT1*
